# Supplementary material for: A two-dimensional porous conjugated porphyrin polymer for uniform lithium deposition
Source: Royal Society of Chemistry journal article supplement (doi:10.1039/d1dt02923a), 2021-01-01
Supplement: d1dt02923a1.pdf [file d1dt02923a1.pdf]

## Two-Dimension Porous Conjugated Porphyrin Polymer for Uniform Lithium Deposition

Chunhua Li, Yu Gu, Yingbin Wang, Bing Sun, Hong Shang\*

School of Science, China University of Geosciences (Beijing), Beijing 100084, P. R.  
China

Corresponding Author: shanghong@cugb.edu.cn

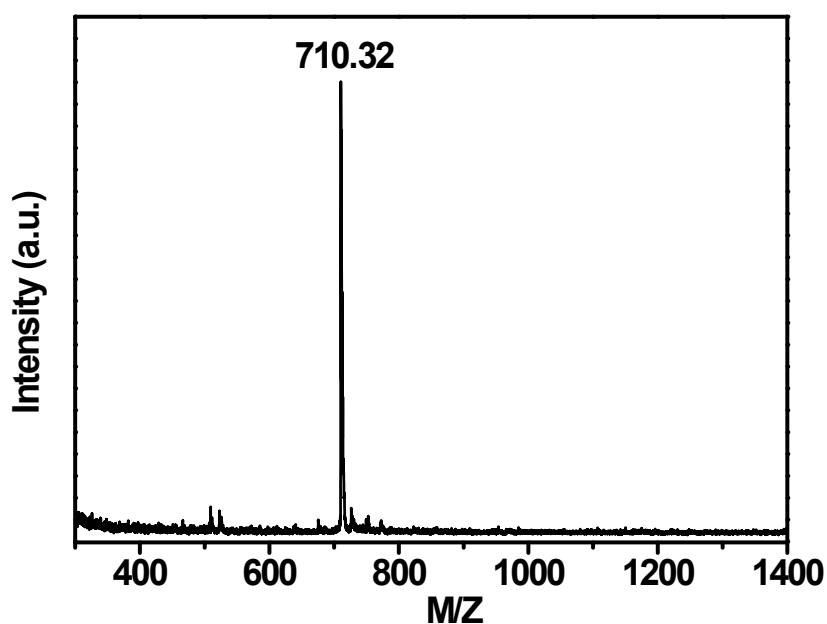

**Fig. S1** The mass spectrum of 5,10,15,20-(tetra-4-ethynylphenyl)porphyrin for the coupling reaction.

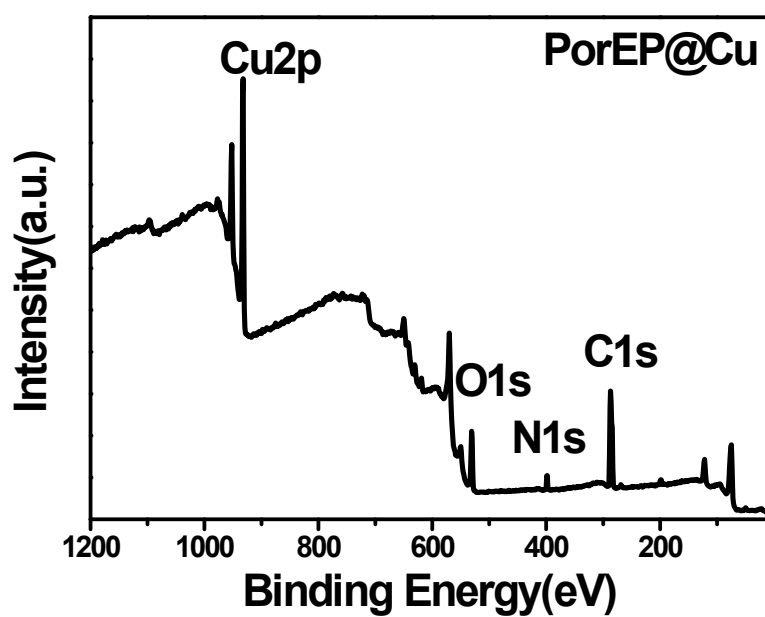

**Fig. S2** XPS spectrum of the obtained PorEP@Cu.

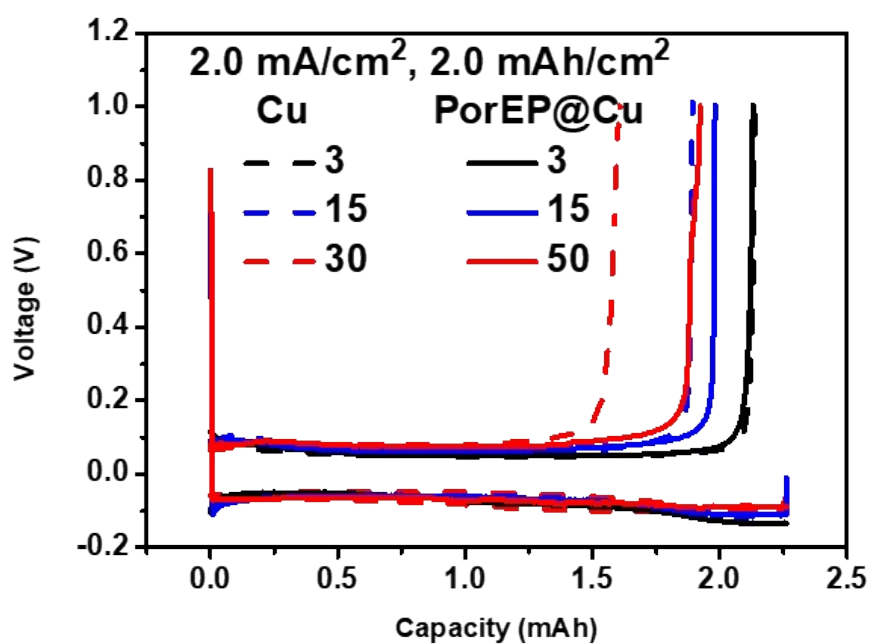

**Fig. S3** The charge/discharge voltage profiles at the current density of 2.0 mA/cm² with a capacity of 2.0 mAh/cm².

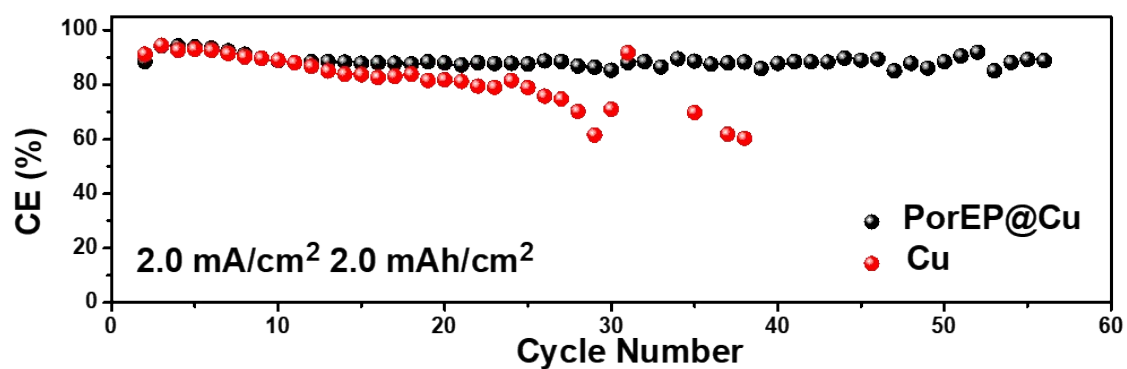

**Fig. S4** Cycling performance at the current density of 2.0 mA/cm<sup>2</sup> with a capacity of 2.0 mAh/cm<sup>2</sup>.

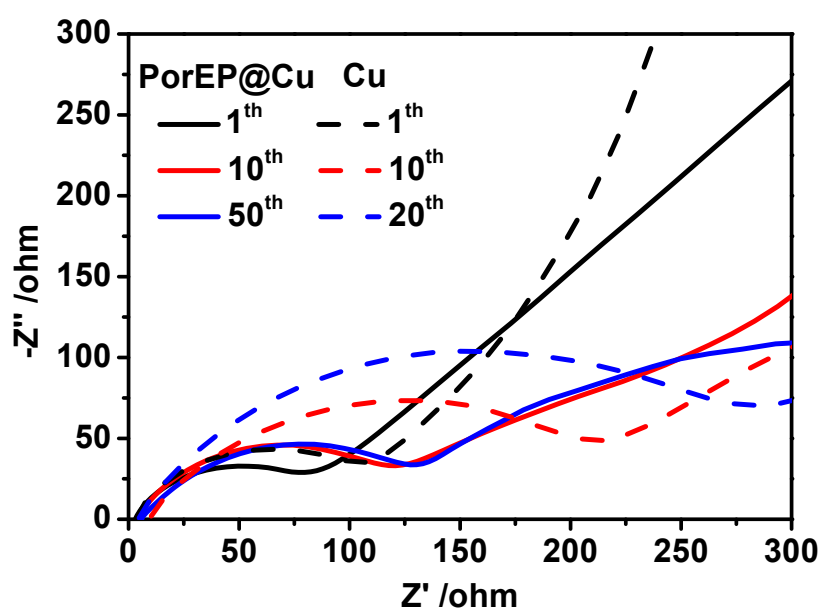

**Fig. S5** Impedance variations during cycling at a current density of 1.0 mA/cm<sup>2</sup> with a capacity of 1.0 mAh/cm<sup>2</sup>.

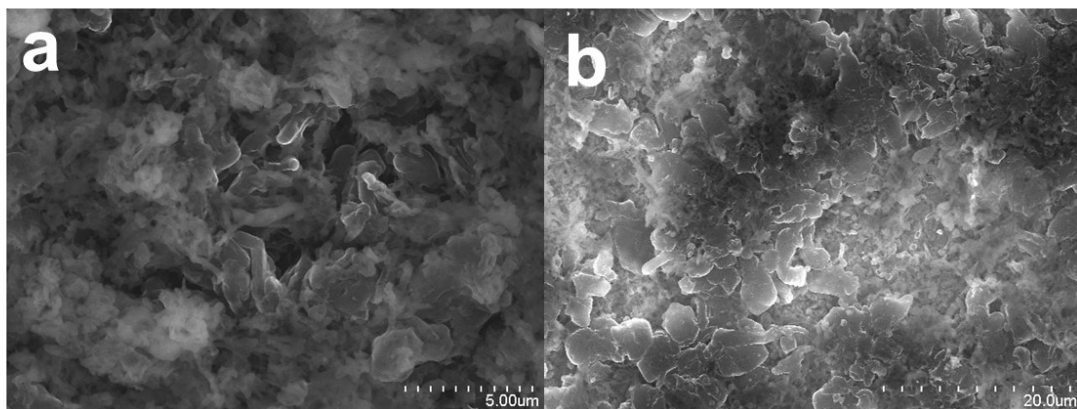

**Fig. S6** Characterization of Li morphology on the electrodes ((a) Cu and (b) PorEP@Cu) after continuous plating at a current density of  $1.0 \text{ mA/cm}^2$  for 1 hour.
